# Supplementary material for: Serum levels of carbohydrate antigen 125 in combination with N-terminal pro-brain natriuretic peptide in patients with acute decompensated heart failure
Source: PubMed Central journal article supplement — Korean J Intern Med. 2018 Dec 31;34(4):811–8. doi: 10.3904/kjim.2017.313 (PMC6610187; doi:10.3904/kjim.2017.313), 2018-12-31
Supplement: kjim-2017-313-suppl1.pdf [file kjim-2017-313-suppl1.pdf]

**Supplementary Table 1. Non-ischemic etiology of the study patients according to survivor status**

|                                    | All patients (n = 413) | Survivors (n = 304) | Event (death) (n = 109) | p value |
|------------------------------------|------------------------|---------------------|-------------------------|---------|
| Non-ischemic etiology              | 270 (65.4)             | 219 (72.0)          | 51 (46.8)               | 0.210   |
| Idiopathic dilated cardiomyopathy  | 134 (32.4)             | 111 (36.5)          | 23 (21.1)               |         |
| Hypertensive heart disease         | 16 (3.9)               | 15 (4.9)            | 1 (0.9)                 |         |
| Valvular heart disease             | 30 (7.3)               | 25 (8.2)            | 5 (4.6)                 |         |
| Alcohol-induced cardiomyopathy     | 2 (0.5)                | 2 (0.7)             | 0                       |         |
| Toxic cardiomyopathy (drugs)       | 1 (0.2)                | 0                   | 1 (0.9)                 |         |
| Tachycardia-induced cardiomyopathy | 39 (7.3)               | 30 (9.9)            | 9 (8.3)                 |         |
| Other                              | 48 (11.6)              | 36 (11.8)           | 12 (11.0)               |         |

Values are presented as number (%).
